# Supplementary material
Source: Springer Nature journal article supplement (https://www.springermedizin.de/resource/supplementary/13002_2009_145_MOESM1_ESM.pdf/9627252)
Supplement: MOESM1 [file 9627252]

### Appendix 1. Medicinal plants used by the Tibetans in Shangri-la

| Scientific Name<br>(Voucher Specimen<br>Number and Family<br>Name)                     | Local<br>Pronunciations | Part(s)/Product<br>Used   | Ethnomedicinal Preparations and<br>Uses                                                                                                                                                                                                                                                                |
|----------------------------------------------------------------------------------------|-------------------------|---------------------------|--------------------------------------------------------------------------------------------------------------------------------------------------------------------------------------------------------------------------------------------------------------------------------------------------------|
| <i>Abutilon paniculatum</i><br>Hand.-Mazz. (1645,<br>Malvaceae) *                      | zha ma                  | Roots & leaves            | Roots and leaves are consumed to moisten the intestine.                                                                                                                                                                                                                                                |
| <i>Acanthocalyx alba</i><br>(Hand.-Mazz.) M. Cannon<br>(1528, Dipsacaceae)             | \                       | Roots                     | Decoction is prepared to cure gynaecological diseases including emmeniopathy.                                                                                                                                                                                                                          |
| <i>Acanthocalyx nepalensis</i><br>(D.Don) M. Cannon<br>(1440, Dipsacaceae) *           | \                       | Roots                     | Roots are stewed with meat and are eaten as tonic.                                                                                                                                                                                                                                                     |
| <i>Agrimonia pilosa</i> var.<br><i>nepalensis</i> (D. Don) Nakai<br>(1584, Rosaceae) * | xian he cao             | Roots                     | Decoction is prepared to cure dysentery and enteritis.                                                                                                                                                                                                                                                 |
| <i>Ajuga forrestii</i> Diels<br>(1624, Labiatae)                                       | ku dan cao              | Rhizome                   | Decoction is consumed to cure dysentery.                                                                                                                                                                                                                                                               |
| <i>Anaphalis busua</i><br>(Buch.-Ham. ex. D. Don)<br>DC. (1603, Asteraceae)            | hie gen wo lü           | Leaves                    | Powder of leaves is applied on the wound caused by cutting and shooting to heal it. The plant is also considered to have veterinary effects.                                                                                                                                                           |
| <i>Anemone hupehensis</i> Lem.<br>(1642, Ranunculaceae)                                | ye mian hua             | Rhizome                   | Decoction is used as anthelmintic.                                                                                                                                                                                                                                                                     |
| <i>Anemone rivularis</i><br>Buch.-Ham. ex DC. (1607,<br>Ranunculaceae)                 | hu zhang cao            | Rhizome                   | Decoction is prepared to cure bronchitis. Powder is consumed with water to cure the same diseases. The plant is considered to have veterinary uses.<br>Decoction has medicinal uses as detoxification, relieving fever, controlling internal hemorrhage and curing measles, dysentery and gastropathy. |
| <i>Arctium lappa</i> Linn.<br>(1575, Asteraceae)                                       | xue rong mu             | Fruits, leaves &<br>roots |                                                                                                                                                                                                                                                                                                        |

|                                                                                         |                 |                            |                                                                                                                                                                                                                                                                                                                                                                                                                                                                                                                                                                                                                 |
|-----------------------------------------------------------------------------------------|-----------------|----------------------------|-----------------------------------------------------------------------------------------------------------------------------------------------------------------------------------------------------------------------------------------------------------------------------------------------------------------------------------------------------------------------------------------------------------------------------------------------------------------------------------------------------------------------------------------------------------------------------------------------------------------|
| <i>Arisaema erubescens</i><br>(Wall.) Schott (1517,<br>Araceae)                         | yi dua          | Tuber                      | Slices of tuber are dipped into brine for 2 days, then cleaned, dried and ground, then put the powder into a fresh clean gallbladder of cattle, expose the gallbladder to sunlight and do not change the gallbladder until the former one is dried. The powder can not be used until it has been put into 9 gallbladders and waited for at least one year later (the longer the better). It is to relieve a cough, cure hemoptysis and control pneumonia.<br>Decoction is prepared to relieve a cough and control the chronic bronchitis. It is also considered to have veterinary uses by traditional healers. |
| <i>Arisaema saxatile</i> Buchet<br>(1587, Araceae) *                                    | dua             | Tuber                      | Tuber is considered to have tonic and hematinic uses.                                                                                                                                                                                                                                                                                                                                                                                                                                                                                                                                                           |
| <i>Asparagus myriacanthus</i><br>Wang et S. C. Chen (1652,<br>Liliaceae)                | tian men dong   | Tuber                      | Crushed roots are mixed with wine and applied on body parts to set a broken bone.                                                                                                                                                                                                                                                                                                                                                                                                                                                                                                                               |
| <i>Astilbe rivularis</i><br>Bich.-Ham. ex D. Don<br>(1562 & 1601,<br>Saxifragaceae) *   | lü sheng ma     | Roots                      | Leaves are steaming with egg and are eaten to cure hemorrhoids and anal hemorrhage.                                                                                                                                                                                                                                                                                                                                                                                                                                                                                                                             |
| <i>Bidens pilosa</i> L. (1619,<br>Asteraceae)                                           | yi bao zhen     | Leaves                     | Whole plant is used to cure a cold.                                                                                                                                                                                                                                                                                                                                                                                                                                                                                                                                                                             |
| <i>Boenninghausenia<br/>albiflora</i> (Hook.)<br>Reichenb. ex Meisn<br>(1650, Rutaceae) | yang bu chi cao | Whole plant                | Decoction is prepared to cure a cold.                                                                                                                                                                                                                                                                                                                                                                                                                                                                                                                                                                           |
| <i>Bupleurum petiolulatum</i><br>Franchet (1516,<br>Umbelliferae) *                     | chai hu         | Whole plant                | Decoction has medicinal uses as emmenagogue and invigorating the circulation of blood.                                                                                                                                                                                                                                                                                                                                                                                                                                                                                                                          |
| <i>Cannabis sativa</i> L. (1627,<br>Cannabiaceae)                                       | suo lu          | Stem & leaves              | Decoction is prepared to wash hair to cure calvities.                                                                                                                                                                                                                                                                                                                                                                                                                                                                                                                                                           |
| <i>Clematis rehderiana</i> Craib<br>(1634, Ranunculaceae)                               | ba zhong        | Stem & leaves              | Fruits, twig and leaves are used as veterinary medicine. Fruits are also eaten as food.                                                                                                                                                                                                                                                                                                                                                                                                                                                                                                                         |
| <i>Cornus capitata</i> Wall.<br>(1621, Cornaceae)                                       | yi mu           | Fruits, stem and<br>leaves | Decoction is prepared to cure                                                                                                                                                                                                                                                                                                                                                                                                                                                                                                                                                                                   |
| <i>Cuscuta japonica</i> Choisy                                                          | yi che ke ta    | Vine                       |                                                                                                                                                                                                                                                                                                                                                                                                                                                                                                                                                                                                                 |

|                                                                            |                          |                 |                                                                                                                                                                                            |
|----------------------------------------------------------------------------|--------------------------|-----------------|--------------------------------------------------------------------------------------------------------------------------------------------------------------------------------------------|
| (1633, Convolvulaceae)                                                     |                          |                 | hepatitis.                                                                                                                                                                                 |
| <i>Cynanchum otophyllum</i><br>Schneid. (1647,<br>Asclepidaceae) *         | ba be da                 | Roots           | Roots are stewed with meat and are eaten to cure rheumatism.                                                                                                                               |
| <i>Cynoglossum amabile</i><br>Stapf et Drumm. (1611,<br>Boraginaceae)      | ci jia mie diu           | Whole plant     | Decoction is to cure dysentery. And the plant with white flowers is considered to have better medicinal uses.                                                                              |
| <i>Cypripedium flavum</i> P. F.<br>Hunt et Summerh. (1401,<br>Orchidaceae) | zang a mie diu           | Rhizome         | Rhizome is used as detoxification medicine, especially when having food poisoning.                                                                                                         |
| <i>Datura stramonium</i> L.<br>(1626, Solanaceae)                          | \                        | seeds & flowers | Crushed seeds are applied on the teeth to relieve toothache. Flower is steeping in wine with a proportion of 1/1000, and a small quantity of wine are drunk to cure rheumatism.            |
| <i>Drosera peltata</i> Smith<br>(1529 & 1665,<br>Droseraceae)              | yong na zong<br>nuo      | Bulbs           | Bulbs are stewed with chicken and are eaten to cure women's eye itching and conjunctivitis. Nine fresh bulbs are swallowed to cure cardialgia.                                             |
| <i>Drynaria sinica</i> Diels<br>(1628 & 1719,<br>Drynariaceae)             | gu sui bu                | Rhizome         | Powder is applied on body parts to set a broken bone and diminish inflammation; Decoction is prepared to stimulate the circulation of the blood and cause the muscles and joints to relax. |
| <i>Galium glandulosum</i><br>Hand.-Mazz. (1639,<br>Rubiaceae) *            | qiang zuo                | Roots           | Decoction of roots and other ingredients is prepared to cure sciatica and rheumatic neuralgia.                                                                                             |
| <i>Geranium sinensis</i><br>R.Knuth (1612,<br>Geraniaceae) *               | ge shan xiao             | Roots           | Decoction is consumed to help digesting and cure dysentery and gastropathy. The plant is also considered as veterinary medicine.                                                           |
| <i>Gerbera nivea</i> Sch.-Bip.<br>(1622, Asteraceae) *                     | bai tou weng             | Whole plant     | Decoction is prepared to cure dysentery.                                                                                                                                                   |
| <i>Gnaphalium hypoleucum</i><br>DC. (1593, Asteraceae)                     | xie xie hie gen<br>wo lü | Leaves          | Powder is applied to heal cutting and shooting wounds. It is considered to have veterinary effects.                                                                                        |

|                                                                                               |                         |                           |                                                                                                                                                                                                               |
|-----------------------------------------------------------------------------------------------|-------------------------|---------------------------|---------------------------------------------------------------------------------------------------------------------------------------------------------------------------------------------------------------|
| <i>Grifola umbellata</i> Pilat<br>(1549, Polyporaceae) *                                      | pa jia tuo ti           | underground<br>sclerotium | Decoction is prepared to promote diuresis and to cure ascites and hydropsy.                                                                                                                                   |
| <i>Habenaria davidii</i> Franch.<br>(1615, Orchidaceae) *                                     | liang xiong di          | Tuber                     | Decoction is prepared to cure sterility.                                                                                                                                                                      |
| <i>Halenia elliptica</i> D. Don<br>(1613 & 1618,<br>Gentianaceae)                             | qing ye dan             | Whole plant               | Decoction of whole plant parts is consumed to cure hepatitis and dysentery. It is also considered as veterinary medicine.                                                                                     |
| <i>Hedera nepalensis</i> var.<br><i>sinensis</i> (Tobl.) Rehd.<br>(1643, Araliaceae)          | mer lü、 a guo lü<br>guo | Stem & leaves             | Decoction is prepared to set a broken bone and cure sciatica.                                                                                                                                                 |
| <i>Hypericum bellum</i> Li<br>(1637, Hypericaceae)                                            | tu lian qiao            | Fruits & leaves           | Decoction helps preventing catching a cold, and decoction of leaves is prepared to cure roup.                                                                                                                 |
| <i>Leontopodium sinense</i><br>Hemsl. (1592,<br>Asteraceae) *                                 | hie gen wo lü           | Leaves                    | Powder is applied to heal cutting and shooting wounds. The plant is also considered to have veterinary effects.                                                                                               |
| <i>Leonurus japonicus</i><br>Houttuyn (1648,<br>Labiatae)                                     | suo ye、 suo pu          | Whole plant               | Whole plant is used to cure emmeniopathy.                                                                                                                                                                     |
| <i>Ligusticum brachylobum</i><br>Franchet (1614,<br>Umbelliferae)                             | be xie mu               | Roots                     | Decoction is consumed to relieve a cough and cure a cold.                                                                                                                                                     |
| <i>Maianthemum<br/>fusciculiflorum</i> (Kawano)<br>S. C. Chen & Kawano<br>(1600, Liliaceae) * | wo bong                 | Rhizome                   | Rhizome is used to promote diuresis.                                                                                                                                                                          |
| <i>Meeboldia yunnanensis</i><br>(H. Wolff) Constance & F.<br>T. Pu (1636,<br>Umbelliferae) *  | \                       | Whole plant               | Decoction of the whole plant is used to relieve a cough and cure a cold.                                                                                                                                      |
| <i>Morus alba</i> L. (1646,<br>Moraceae)                                                      | \                       | Roots, bark and<br>twig   | Decoction is prepared to relieve a cough and cure neuralgia.<br>Whole plant is cut up and stir-fried, and then boiled. Decoction is to cure a cold and clean the bowel by purging when having food poisoning. |
| <i>Origanum vulgare</i> L.<br>(1574, Labiatae)                                                | le ren ne ba            | Whole plant               | Decoction is to cure rheumatism and gastropathy.                                                                                                                                                              |
| <i>Paeonia delavayi</i> var.<br><i>lutea</i> (Delavay ex Franch.)<br>Finet et Gagnep. (1556,  | a duo luo duo           | Bark                      |                                                                                                                                                                                                               |

Paeoniaceae)

|                                                                                 |                |             |                                                                                                                                                                                                                                                                                        |
|---------------------------------------------------------------------------------|----------------|-------------|----------------------------------------------------------------------------------------------------------------------------------------------------------------------------------------------------------------------------------------------------------------------------------------|
| <i>Panax japonicus</i> (Nees )C. A. Meyer (1480 & 1522, Araliaceae)             | ge da qi       | Rhizome     | Rhizome is stewed with meat and eaten as tonic; Powder of rhizome is applied to set a broken bone and stanch a cut.                                                                                                                                                                    |
| <i>Phytolacca acinosa</i> Roxb. (1590, Phytolaccaceae)                          | tuo qiong      | Roots       | Roots are crushed and applied on the navel to promote diuresis.                                                                                                                                                                                                                        |
| <i>Pimpinella candolleana</i> Wight & Arn (1545, Umbelliferae) *                | yang shan chou | Roots       | Roots are cut up and steamed with egg, and the mixture is eaten to cure gastropathy.                                                                                                                                                                                                   |
| <i>Pinus densata</i> Mast. (1559, Pinaceae)                                     | no peng        | Turpentine  | Turpentine to cure arthritis and arthrosis gall.<br>Decoction is used to clear away heat, cure dysentery, stimulate the circulation of the blood, cause the muscles and joints to relax and prevent catching a cold. Powder is applied to set a broken bone and diminish inflammation. |
| <i>Pleurospermum rivulorum</i> (Diels) K. T. Fu & Y. C. Ho (1602, Umbelliferae) | qiang huo      | Roots       | Decoction is used to clear away heat, cure dysentery, stimulate the circulation of the blood, cause the muscles and joints to relax and prevent catching a cold. Powder is applied to set a broken bone and diminish inflammation.                                                     |
| <i>Polygonum macrophyllum</i> D. Don (1609, Polygonaceae)                       | lang qu        | Rhizome     | Powder is consumed with water to cure gastropathy and dysentery.                                                                                                                                                                                                                       |
| <i>Polygonum paleaceum</i> var. <i>pubifolium</i> Sam. (1598, Polygonaceae) *   | rang qu        | Rhizome     | Powder is consumed with water to cure gastropathy and dysentery.                                                                                                                                                                                                                       |
| <i>Potentilla anserina</i> L. (1591, Rosaceae)                                  | fan bai ye     | Roots       | Decoction is consumed to control leukorrhea flow. It is also considered to have veterinary uses.                                                                                                                                                                                       |
| <i>Prunus mira</i> Koehne (1635, Rosaceae)                                      | ka muo         | Nutlets     | Relieving a cough and cure injuries from falls, fractures, contusions and strains.                                                                                                                                                                                                     |
| <i>Psammosilene tunicoides</i> W. C. Wu et C. Y. Wu (1608, Caryophyllaceae)     | du ding zi     | Roots       | Roots getting rid of bark are dried and ground, and powder is taken with water to cure gastropathy or is applied to stanch a cut.                                                                                                                                                      |
| <i>Pteris cretica</i> L. (1640, Pteridaceae) *                                  | feng wei cao   | Whole plant | Decoction is prepared to promote diuresis and cure cystitis.                                                                                                                                                                                                                           |
| <i>Rumex nepalensis</i> Spreng. (1548, Polygonaceae)                            | a gong bu li   | Roots       | Decoction of roots is prepared to help digesting and purging and to cure gastric diseases and stomach swelling.                                                                                                                                                                        |

|                                                                                    |                                |             |                                                                                                                                                                                                                             |
|------------------------------------------------------------------------------------|--------------------------------|-------------|-----------------------------------------------------------------------------------------------------------------------------------------------------------------------------------------------------------------------------|
| <i>Salvia flava</i> Forrest ex Diels (1519, Labiatae)                              | da hong shen                   | Roots       | Decoction is prepared to cure emmeniopathy and stimulate the circulation of the blood.                                                                                                                                      |
| <i>Salvia trijuga</i> Diels (1583, Labiatae)                                       | xiao hong shen,<br>yong zhu mu | Roots       | Decoction is prepared to cure diseases such as having much menstrual flow and sterility. The plant is also considered as veterinary medicine.                                                                               |
| <i>Satyrium yunnanense</i> Rolfe (1361, Orchidaceae) *                             | liang xiong di                 | Tuber       | Decoction is prepared to cure sterility.                                                                                                                                                                                    |
| <i>Senecio laetus</i> Edgew. (1625, Asteraceae) *                                  | tu san qi                      | Whole plant | Decoction is prepared to cure rheumatism.                                                                                                                                                                                   |
| <i>Sinopodophyllum hexandrum</i> (Royle) T.S Ying (1594, Berberidaceae)            | a ga mie le                    | Seeds       | Decoction is to cure antenatal pain happened before or after childbirth and help expelling placenta.                                                                                                                        |
| <i>Sophora davidii</i> (Fr.) Komarov ex Pavol (1632, Papilionaceae)                | cha ke mu                      | Seeds       | Crushed seeds are applied on teeth to control toothache.                                                                                                                                                                    |
| <i>Stellera chamaejasme</i> f. <i>chrysantha</i> S. C. Huang (1525, Thymelaeaceae) | shu she mie diu                | Roots       | Powder of roots is consumed with water to cure stomach swelling and help purging to clean the bowel when having food poisoning. Roots are dried in sun without meeting rain, or they would turn green and became poisonous. |
| <i>Thalictrum javanicum</i> Bl. (1539, Ranunculaceae)                              | jin si huang lian              | Roots       | Decoction of roots will be consumed to cure dysentery and enteritis, to prevent catching a cold, to allay a fever and help detoxification. The plant is also considered to have veterinary uses.                            |
| <i>Verbascum thapsus</i> L. (1571, Scrophulariaceae)                               | hie shong                      | Leaves      | Fresh leaves are roasted to yellow and crushed, applying leaves on body parts to heal a cut.                                                                                                                                |
| <i>Verbena officinalis</i> L. (1623 & 1672, Verbenaceae)                           | \                              | Roots       | Decoction of roots is consumed to control toothache and cure dysentery.                                                                                                                                                     |
| <i>Viburnum kansuense</i> Batal. (1446, Caprifoliaceae) *                          | \                              | Fruits      | Fruits are steeped into wine and used as tonic.                                                                                                                                                                             |

|                                                                   |                       |             |                                                                                                                                      |
|-------------------------------------------------------------------|-----------------------|-------------|--------------------------------------------------------------------------------------------------------------------------------------|
| <i>Viola tienschiensis</i><br>W.Becker (1630,<br>Violaceae) *     | pen ba chong<br>chong | whole plant | Decoction is applied on body parts<br>to cure chilblain and heal cut.                                                                |
| <i>Wikstroemia ligustrina</i><br>Rehd. (1586,<br>Thymelaeaceae) * | lue ran me            | Bark        | Decoction is prepared to set a<br>broken bone and to cure sciatica and<br>injuries from falls, fractures,<br>contusions and strains. |

## Appendix 2. Plant-based traditional prescriptions used by the Tibetans in Shangri-la

| Scientific Name                                                   | Prescriptions                                                                                                                                                                                                                                                                                               |
|-------------------------------------------------------------------|-------------------------------------------------------------------------------------------------------------------------------------------------------------------------------------------------------------------------------------------------------------------------------------------------------------|
| <i>Acanthocalyx alba</i> (Hand.-Mazz.) M.<br>Cannon               | Roots are boiled with "tu yang shen" ( <i>Triplostegia glandulifera</i> Wall.), "bai ling shen" (plants belong to Araliaceae), "yi mu cao" ( <i>Leonurus heterophyllus</i> Sweet), "xiao hong shen" ( <i>Salvia trijuga</i> Diels) and "da hong shen" ( <i>Salvia flava</i> Forrest ex Diels).              |
| <i>Agrimonia pilosa</i> var. <i>nepalensis</i><br>(D.Don) Nakai * | Roots are boiled with "rang qu" ( <i>Polygonum paleaceum</i> var. <i>pubifolium</i> Sam.), "ge shan xiao" ( <i>Geranium sinensis</i> R. Knuth) and "chuan xin lian" [ <i>Andrographis paniculata</i> (Burm. f.) Nees].<br>Rhizome is boiled with "bai tou weng" ( <i>Gerbera nivea</i> Sch.-Bip.) in water. |
| <i>Ajuga forrestii</i> Diels<br><i>Anemone hupehensis</i> Lem.    | Rhizome is boiled with the bark of " <i>Punica granatum</i> L.", the seeds of " <i>Melia azedarach</i> L.", the tube of " <i>Stemona japonica</i> (BL) Miq." and the seeds of " <i>Cucurbita moschata</i> Duch".                                                                                            |
| <i>Anemone rivularis</i> Buch.-Ham. ex DC.                        | Rhizome is boiled with "ban xia" [ <i>Pinellia ternata</i> (Thunb.) Breit.] and another unknown ingredient.                                                                                                                                                                                                 |
| <i>Arctium lappa</i> Linn.                                        | Fruit, leaves and roots are boiled with "rang qu" ( <i>Polygonum paleaceum</i> var. <i>pubifolium</i> Sam.) and "ge shan xiao" ( <i>Geranium sinensis</i> R. Knuth) in water.                                                                                                                               |
| <i>Arisaema saxatile</i> Buchet *                                 | Tubers are boiled with "ren shen" ( <i>Panax ginseng</i> C. A. Mey.) and "gan cao" ( <i>Glycyrrhiza uralensis</i> Fisch.) in water.                                                                                                                                                                         |
| <i>Cannabis sativa</i> L.                                         | Stem and leaves are boiled with "xiao hong shen" ( <i>Salvia trijuga</i> Diels) and "da hong shen" ( <i>Salvia flava</i> Forrest ex Diels).                                                                                                                                                                 |
| <i>Cuscuta japonica</i> Choisy                                    | Bine and leaves are boiled with "qing ye dan" ( <i>Halenia elliptica</i> D. Don) and "ku dan cao" ( <i>Ajuga forrestii</i> Diels) in water.                                                                                                                                                                 |
| <i>Datura stramonium</i> L.                                       | Crushed seed are mixed with liquid wax.                                                                                                                                                                                                                                                                     |
| <i>Geranium sinensis</i> R. Knuth *                               | Roots are boiled with "rang qu" ( <i>Polygonum paleaceum</i> var. <i>pubifolium</i> Sam.) and "ge shan xiao" ( <i>Geranium sinensis</i> R. Knuth) in water.                                                                                                                                                 |
| <i>Gerbera nivea</i> Sch.-Bip. *                                  | Whole plant parts are boiled with "qing ye dan" ( <i>Halenia elliptica</i> D. Don).                                                                                                                                                                                                                         |
| <i>Grifola umbellata</i> (Pers.:Fr.) Pilat *                      | Sclerotium is boiled with "xiao mu tong" ( <i>Clematis armandii</i>                                                                                                                                                                                                                                         |

|                                                                                 |                                                                                                                                                                                                                                                                                                                                                                                                                       |
|---------------------------------------------------------------------------------|-----------------------------------------------------------------------------------------------------------------------------------------------------------------------------------------------------------------------------------------------------------------------------------------------------------------------------------------------------------------------------------------------------------------------|
|                                                                                 | Franch.), "fu ling" [ <i>Poria cocos</i> (Schw.) Wolf], "shi wei" [ <i>Pyrrisia lingua</i> (Thunb.) Farwell], "wu gong cao" ( <i>Pteris vittata</i> L.), "ma bian cao" ( <i>Verbena officinalis</i> L.), "bian xu" ( <i>Polygonum aviculare</i> L.) and "che qian cao" ( <i>Plantago asiatica</i> L.).                                                                                                                |
| <i>Habenaria davidii</i> Franch. *                                              | Tubers are boiled with "tu yang shen" ( <i>Triplostegia glandulifera</i> Wall.), "bai ling shen" (plants belong to Araliaceae), "xiao hong shen" ( <i>Salvia trijuga</i> Diels) and " <i>Acanthocalyx nepalensis</i> (D.Don) M. Cannon" in water.                                                                                                                                                                     |
| <i>Ligusticum brachylobum</i> Franchet                                          | Roots are boiled with " <i>Aster tataricus</i> L. f." in water.                                                                                                                                                                                                                                                                                                                                                       |
| <i>Paeonia delavayi</i> var. <i>lutea</i> (Delavay ex Franch.) Finet et Gagnep. | Dried bark is boiled with " <i>Euonymus vagans</i> Wall." and " <i>Magnolia officinalis</i> var. <i>biloba</i> Rehd. et Wils."                                                                                                                                                                                                                                                                                        |
| <i>Phytolacca acinosa</i> Roxb.                                                 | Roots are crushed with muskiness.                                                                                                                                                                                                                                                                                                                                                                                     |
| <i>Pinus densata</i> Mast.                                                      | Turpentine is applied with tallow.                                                                                                                                                                                                                                                                                                                                                                                    |
| <i>Pleurospermum rivulorum</i> (Diels) K. T. Fu & Y. C. Ho                      | Roots are boiled with the bark of plants of " <i>Berberis</i> ", the leaves of plants of " <i>Eucalyptus</i> " species, "wu gong cao" ( <i>Pteris vittata</i> L.), "fang feng" [ <i>Saposhnikovia divaricata</i> (Turcz.) Schischk.] and "huang qin" ( <i>Scutellaria baicalensis</i> Georgi) in water.                                                                                                               |
| <i>Polygonum macrophyllum</i> D.Don                                             | Rhizome is boiled with "ge shan xiao" ( <i>Geranium sinensis</i> R. Knuth) or fried rhizome is ground with "ge shan xiao" .                                                                                                                                                                                                                                                                                           |
| <i>Polygonum paleaceum</i> var. <i>pubifolium</i> Sam. *                        | Rhizome is boiled with "ge shan xiao" ( <i>Geranium sinensis</i> R. Knuth) or fried rhizome is ground with "ge shan xiao".                                                                                                                                                                                                                                                                                            |
| <i>Potentilla anserina</i> L.                                                   | Roots are boiled with "xiao hong shen" ( <i>Salvia trijuga</i> Diels) and "da hong shen" ( <i>Salvia flava</i> Forrest ex Diels).                                                                                                                                                                                                                                                                                     |
| <i>Prunus mira</i> Koehne                                                       | Nutlets and almond are used together.                                                                                                                                                                                                                                                                                                                                                                                 |
| <i>Pteris cretica</i> L. *                                                      | The whole plant is boiled with "xiao mu tong" ( <i>Clematis armandii</i> Franch.), "che qian cao" ( <i>Plantago asiatica</i> L.) and "fu ling" [ <i>Poria cocos</i> (Schw.) Wolf].                                                                                                                                                                                                                                    |
| <i>Salvia flava</i> Forrest ex Diels                                            | Roots are boiled with "xiao hong shen" ( <i>Salvia trijuga</i> Diels), "da hong shen" ( <i>Salvia flava</i> Forrest ex Diels) and "fan bai ye" ( <i>Potentilla anserina</i> L.) in water.                                                                                                                                                                                                                             |
| <i>Salvia trijuga</i> Diels                                                     | ①: Roots are boiled with "da hong shen" ( <i>Salvia flava</i> Forrest ex Diels) and "fan bai ye" ( <i>Potentilla anserina</i> L.) . ②: Roots are boiled with "liang xiong di" ( <i>Habenaria davidii</i> Franch./ <i>Satyrium yunnanense</i> Rolfe), "tu yang shen" ( <i>Triplostegia glandulifera</i> Wall.), "bai ling shen" (plants belong to Araliaceae) and " <i>Acanthocalyx nepalensis</i> (D.Don) M. Cannon". |
| <i>Satyrium yunnanense</i> Rolfe *                                              | Tubers are boiled with "tu yang shen" ( <i>Triplostegia glandulifera</i> Wall.), "bai ling shen" (plants belong to Araliaceae), "xiao hong shen" ( <i>Salvia trijuga</i> Diels) and " <i>Acanthocalyx nepalensis</i> (D.Don) M. Cannon".                                                                                                                                                                              |
| <i>Stellera chamaejasme</i> f. <i>chrysantha</i> S. C. Huang                    | Roots are ground with "tu da huang" ( <i>Rumex nepalensis</i> Spreng.), "chen xiang" [ <i>Aquilaria sinensis</i> (Lour.) Gilg] and "ba dou" ( <i>Croton tiglium</i> L.).                                                                                                                                                                                                                                              |



*Thalictrum javanicum* Bl.

①: Boiling the dried roots with "rang qu" (*Polygonum paleaceum* var. *pubifolium* Sam.), "xian he cao" [*Agrimonia pilosa* var. *nepalensis* (D. Don) Nakai], "bai tou weng" (*Gerbera nivea* Sch.-Bip.), "ci jia mie diu" (*Cynoglossum amabile* Stapf et Drumm.) and "Berberis" species. ②: Dried roots are boiled with "wu gong cao" (*Pteris vittata* L.), dried tangerine peel, "jin yin hua" (*Lonicera japonica* Thunb.), the bark of "*Phellodendron amurense* Rupr." and plant of "*Berberis*" species.

*Viola tienschiensis* W. Becker \*

Whole plant is boiled with "tu da huang" (*Rumex nepalensis* Spreng.).

*Wikstroemia ligustrina* Rehd. \*

Bark is boiled with "*Acer buergerianum* Miq.", the roots of "qiang zuo" (*Galium glandulosum* Hand.-Mazz.) and the twig of "*Morus alba* L.".
